# Supplementary material for: Phylogenomic characterization of ranaviruses isolated from cultured fish and amphibians in Thailand
Source: Atypon-hosted journal article supplement (doi:10.1139/facets-2020-0043), 2020-01-01
Supplement: facets-2020-0043_supplement3.pdf [file facets-2020-0043_supplement3.pdf]

Subclade Species

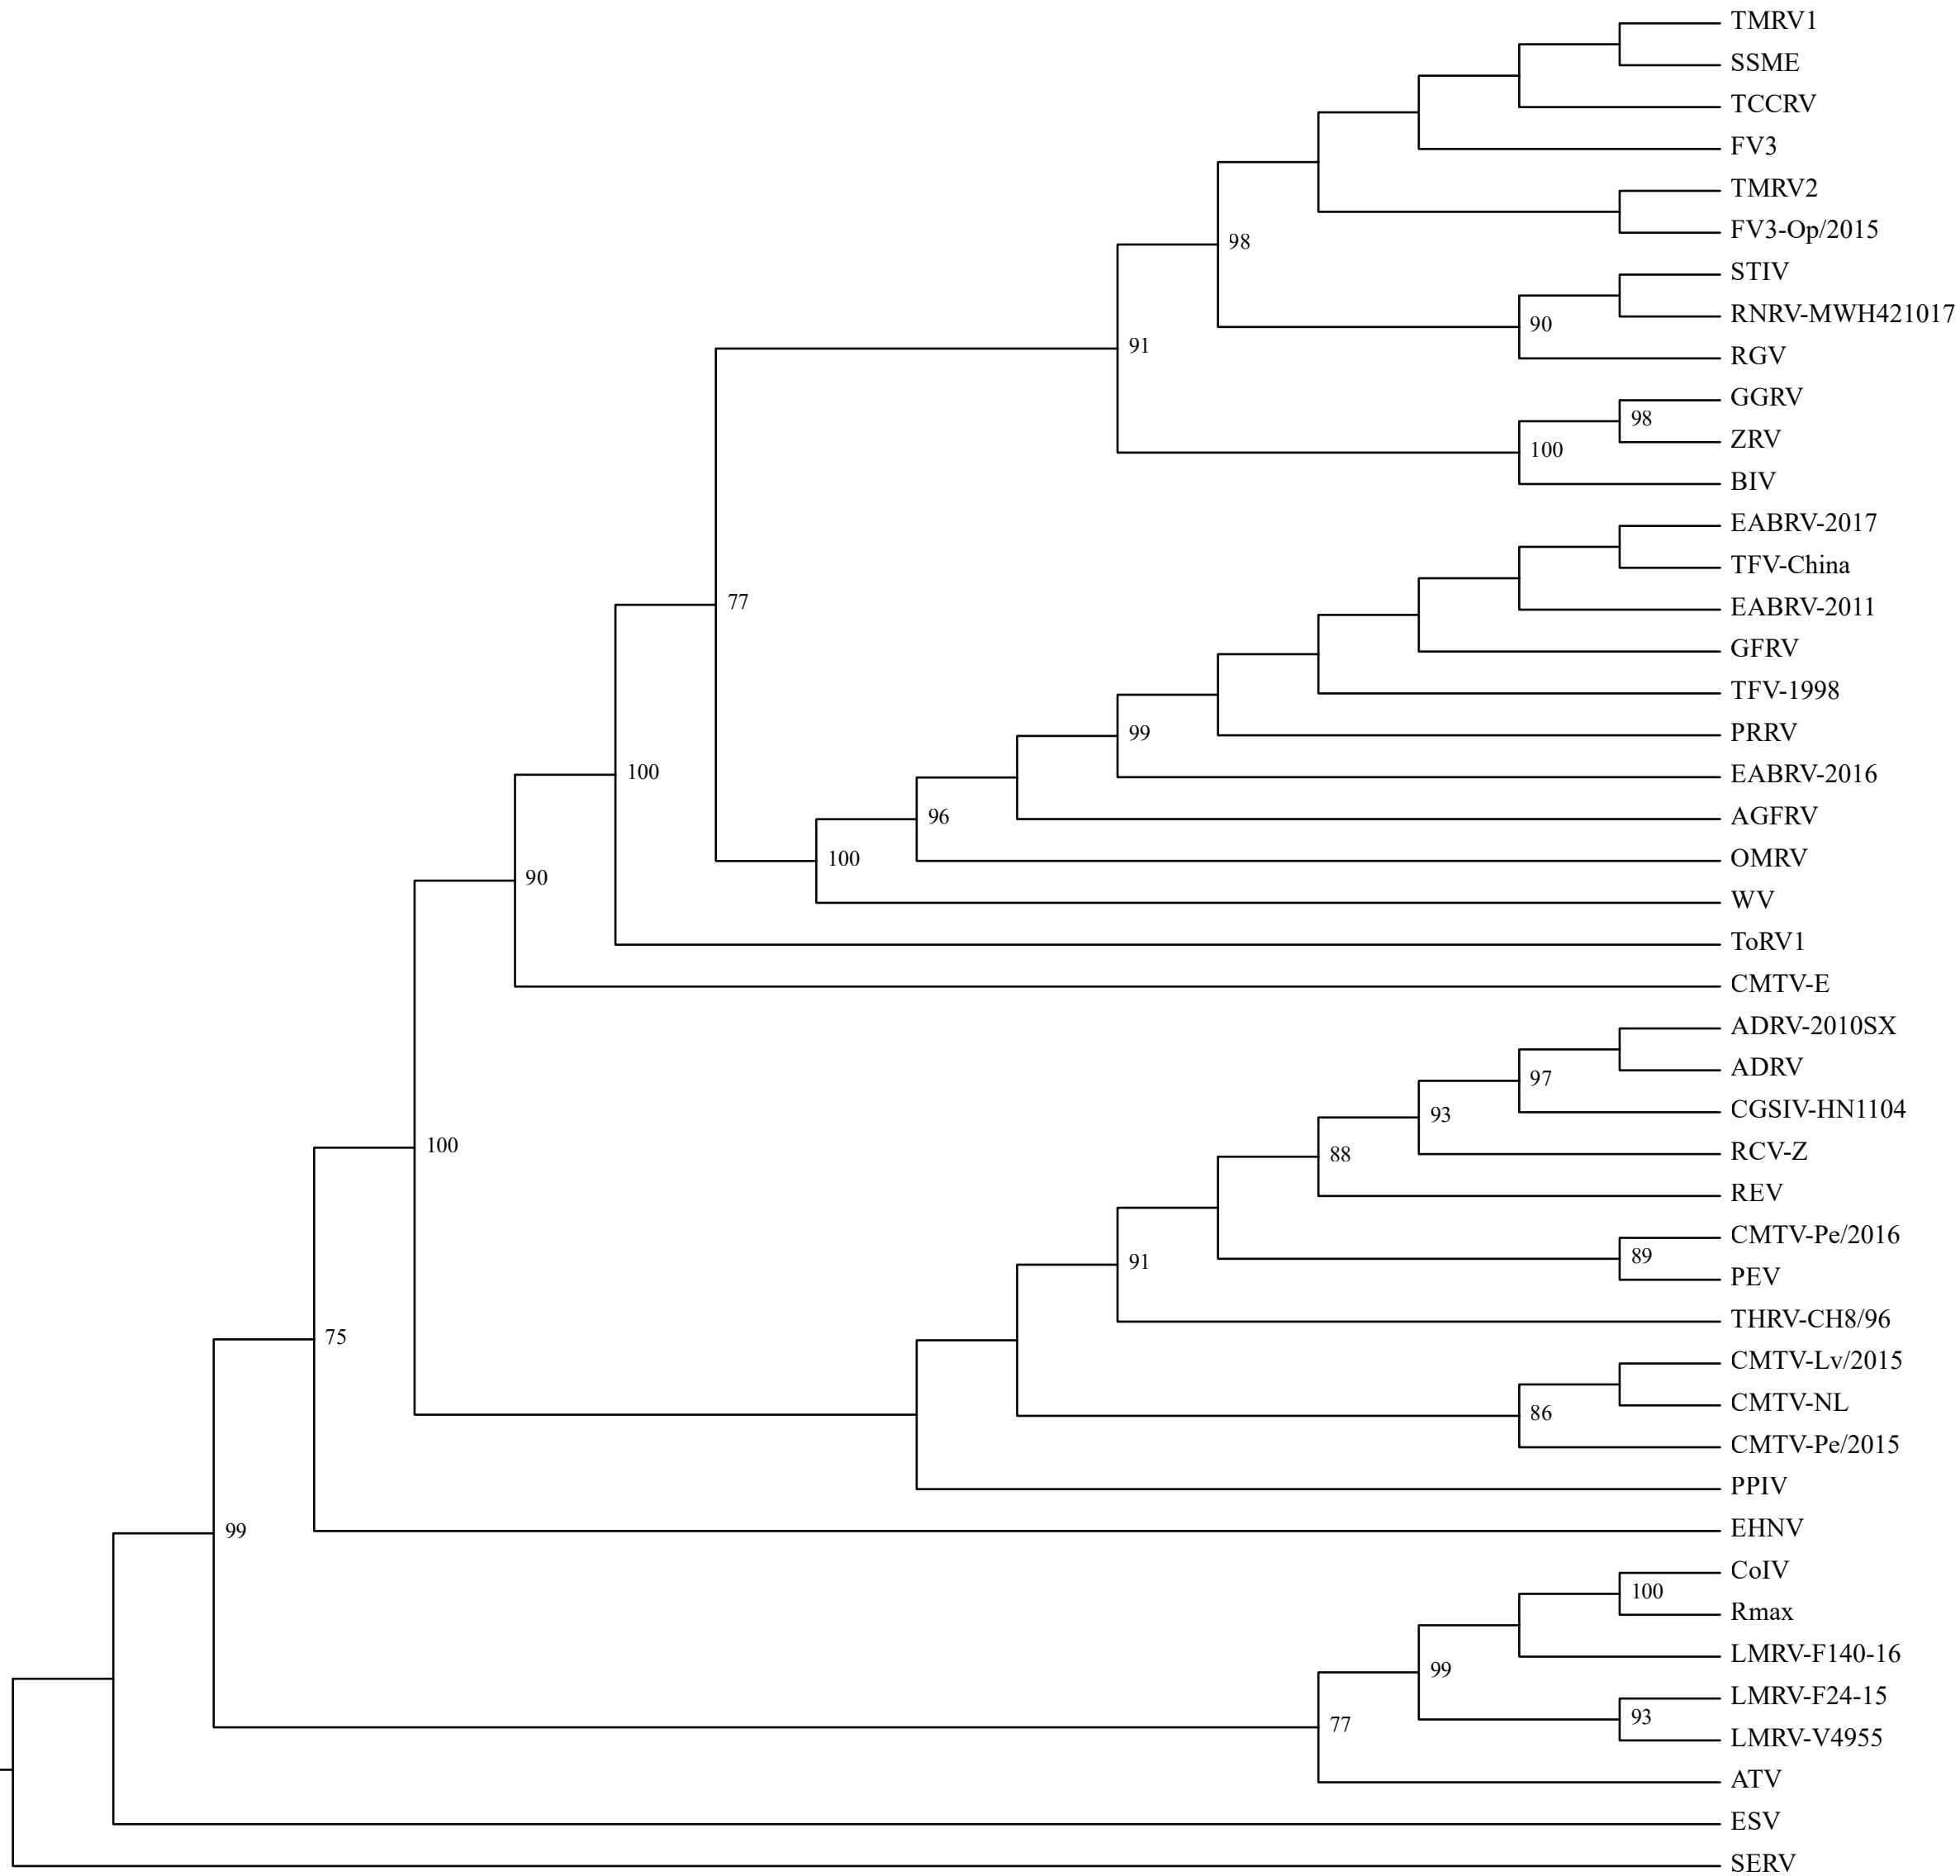

FV3

BIV

TFV

*Frog virus 3*

*Common midwife toad virus*

*Epizootic haematopoietic necrosis virus*

European North Atlantic Ranavirus\*

*Ambystoma tigrinum virus*

*Epizootic haematopoietic necrosis virus*

TMRV1  
 SSME  
 TCCR  
 FV3  
 TMRV2  
 FV3-Op/2015  
 STIV  
 RNRV-MWH421017  
 RGV  
 GGRV  
 ZRV  
 BIV  
 EABRV-2017  
 TFV-China  
 EABRV-2011  
 GFRV  
 TFV-1998  
 PRRV  
 EABRV-2016  
 AGFRV  
 OMRV  
 WV  
 ToRV1  
 CMTV-E  
 ADRV-2010SX  
 ADRV  
 CGSIV-HN1104  
 RCV-Z  
 REV  
 CMTV-Pe/2016  
 PEV  
 THRV-CH8/96  
 CMTV-Lv/2015  
 CMTV-NL  
 CMTV-Pe/2015  
 PPIV  
 EHNV  
 CoIV  
 Rmax  
 LMRV-F140-16  
 LMRV-F24-15  
 LMRV-V4955  
 ATV  
 ESV  
 SERV

98

91

77

99

100

96

100

91

75

99

77

98

90

100

99

100

96

100

91

75

99

77

97

93

88

89

86

100

99

93

93
