# Supplementary figures and images for: Phylogenomic characterization of ranaviruses isolated from cultured fish and amphibians in Thailand
Source: Atypon-hosted journal article supplement (doi:10.1139/facets-2020-0043), 2020-01-01

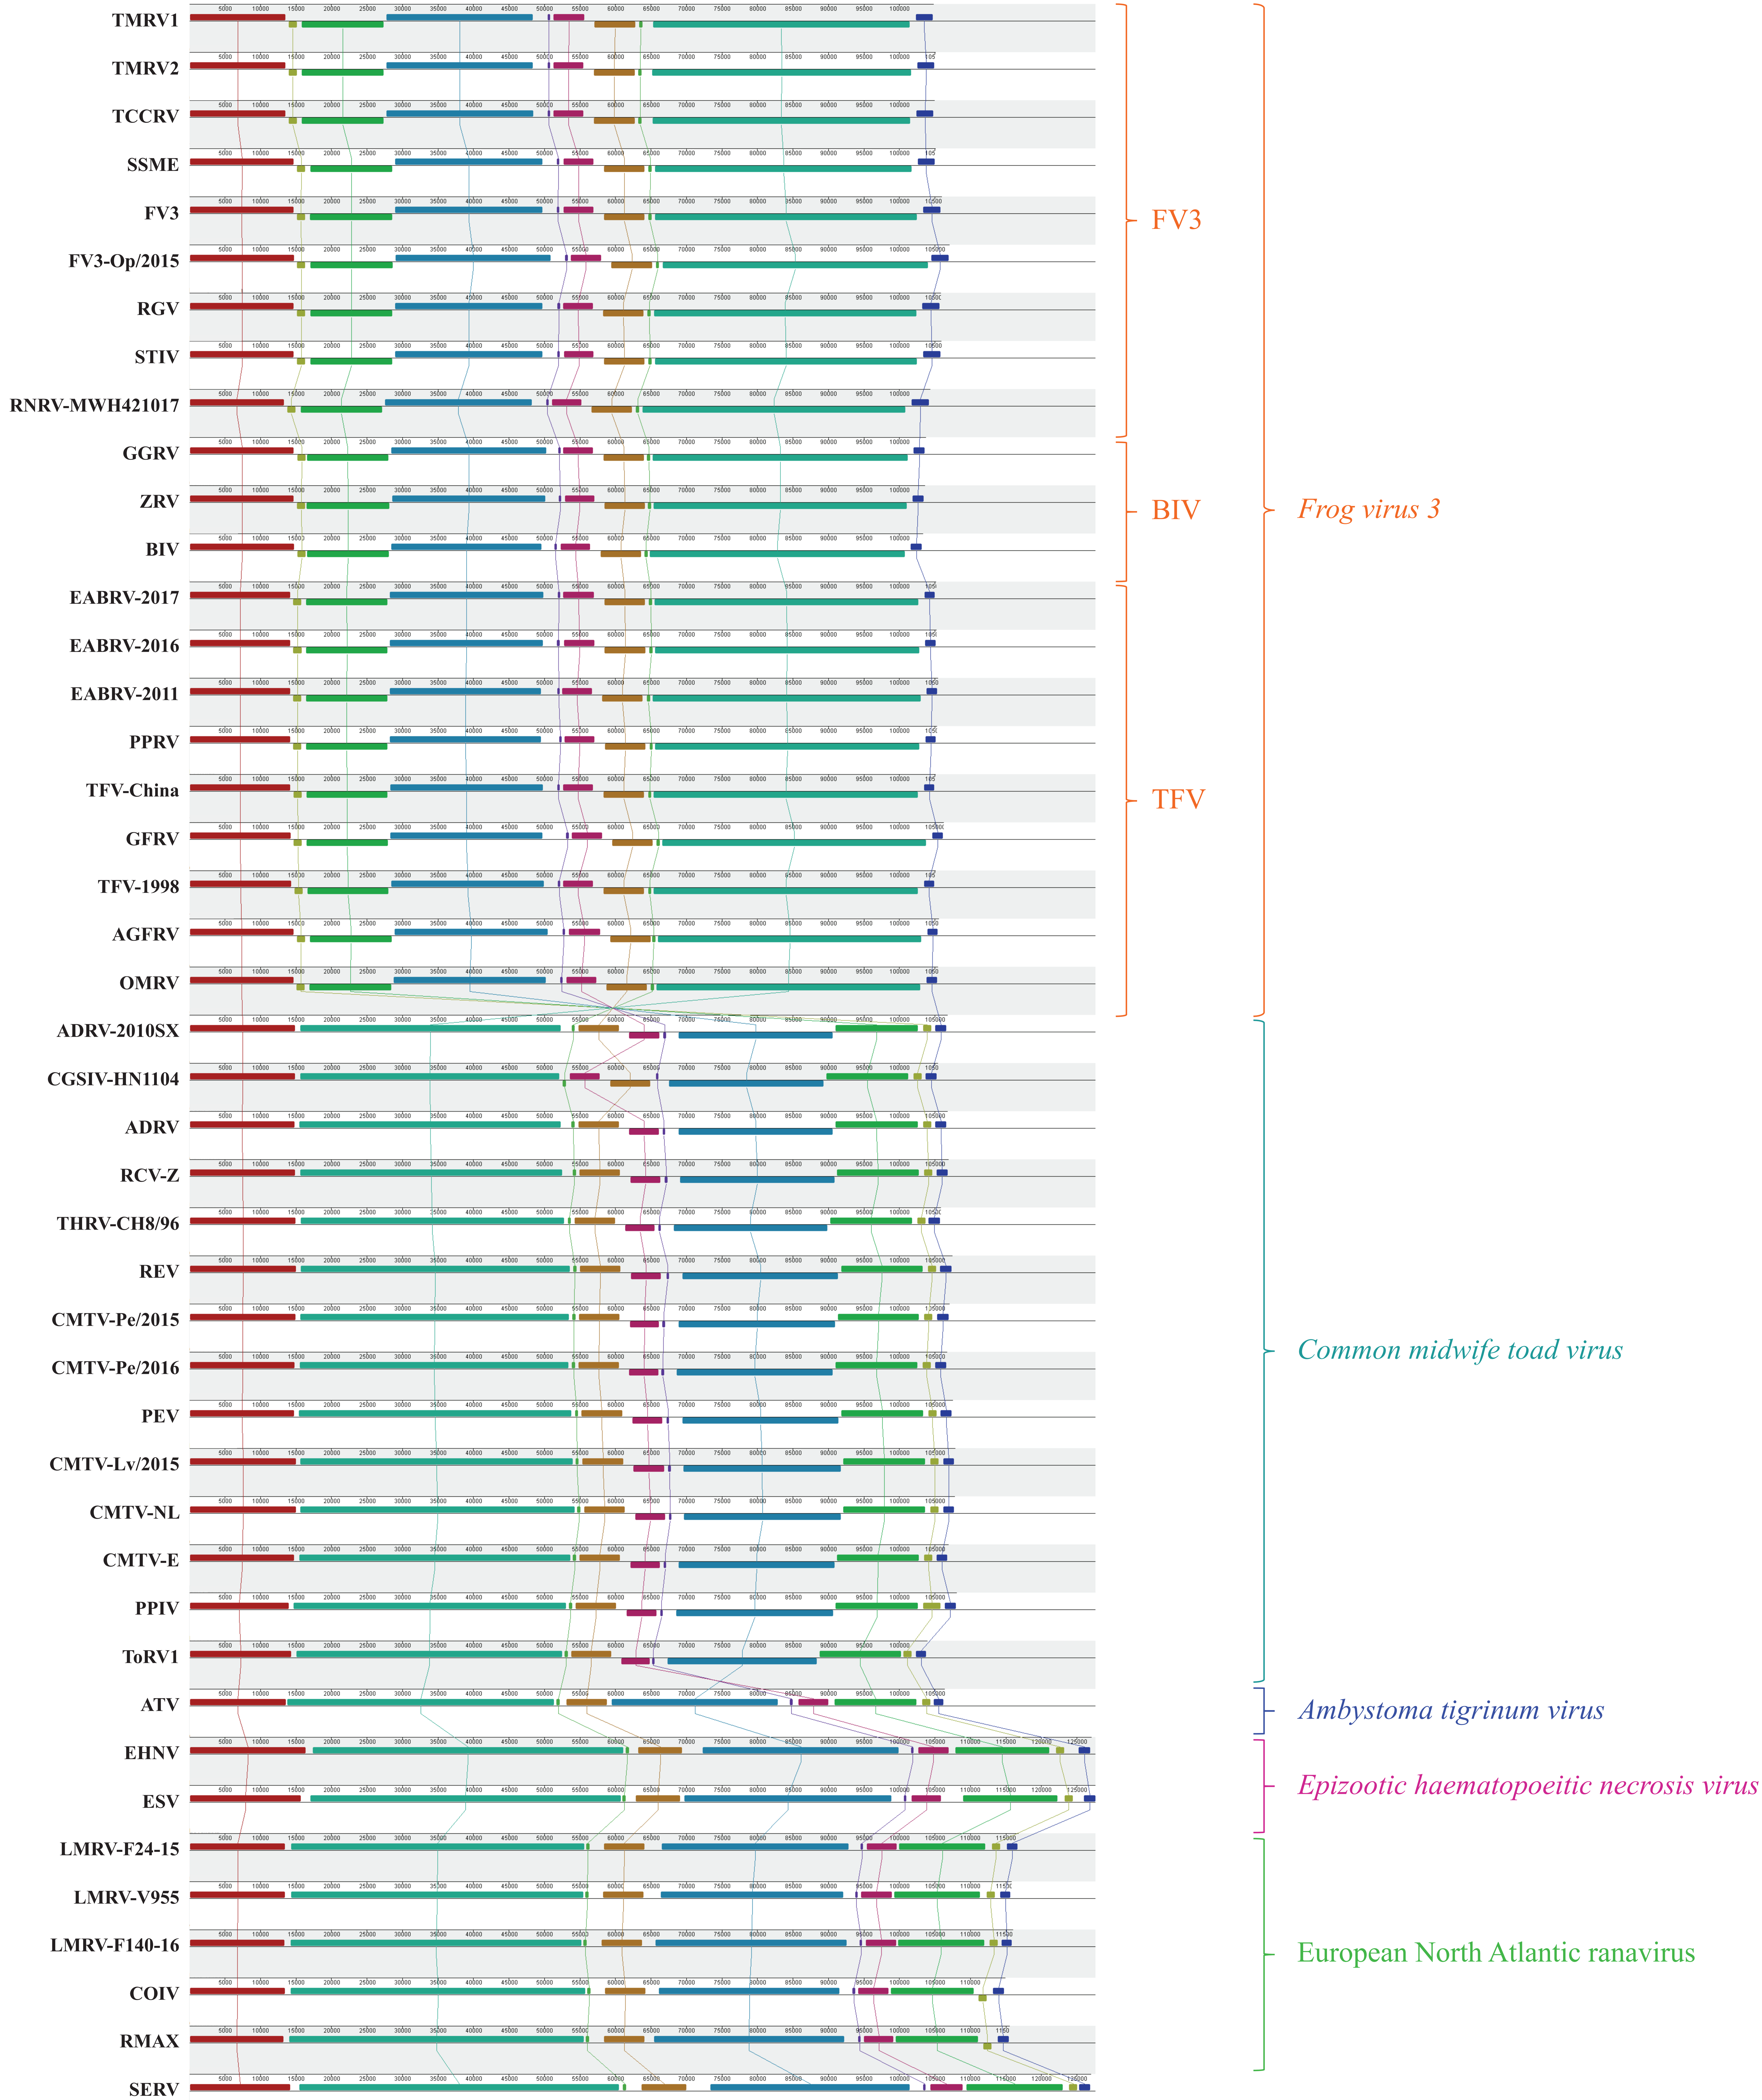

Supplement: facets-2020-0043_supplement1.pdf [file facets-2020-0043_supplement1.pdf]
